# Supplementary material for: ALS-Associated FUS Mutations Result in Compromised FUS Alternative Splicing and Autoregulation
Source: PubMed Central journal article supplement (PMC3814325; doi:10.1371/journal.pgen.1003895), 2013-10-31
Supplement: pgen.1003895.s012.pdf [file pgen.1003895.s012.pdf]

**Table S3. List of FUS-associated cassette exons in the complexity map**

| Cluster Rank | GeneSymbol | RefSeqID     | Chr   | Strand | ExonStart | ExonEnd   |
|--------------|------------|--------------|-------|--------|-----------|-----------|
| 7            | FUS        | NM_001170634 | chr16 | +      | 31198122  | 31198157  |
| 20           | FUS        | NM_001170634 | chr16 | +      | 31200443  | 31200547  |
| 44           | CD55       | NM_000574    | chr1  | +      | 207497903 | 207498095 |
| 56           | VAPB       | NM_004738    | chr20 | +      | 57015962  | 57016139  |
| 74           | TBC1D14    | NM_001113363 | chr4  | +      | 7011603   | 7011675   |
| 91           | PBX1       | NM_002585    | chr1  | +      | 164532474 | 164532548 |
| 114          | PDPK1      | NM_002613    | chr16 | +      | 2616356   | 2616454   |
| 130          | ATP2A2     | NM_170665    | chr12 | +      | 110784005 | 110788897 |
| 148          | TCF12      | NM_207038    | chr15 | +      | 57355947  | 57356021  |
| 177          | OGDH       | NM_001003941 | chr7  | +      | 44684925  | 44685117  |
| 219          | PDPK1      | NM_002613    | chr16 | +      | 2647123   | 2647276   |
| 224          | C11orf49   | NM_001003676 | chr11 | +      | 47073938  | 47074069  |
| 225          | MXI1       | NM_005962    | chr10 | +      | 112004585 | 112004615 |
| 249          | TACC2      | NM_206861    | chr10 | +      | 123903086 | 123903221 |
| 260          | GLI2       | NM_005270    | chr2  | +      | 121684936 | 121685042 |
| 266          | SYNE2      | NM_182914    | chr14 | +      | 64656788  | 64656955  |
| 289          | ZNF182     | NM_006962    | chrX  | -      | 47847923  | 47848017  |
| 301          | WDR25      | NM_024515    | chr14 | +      | 100934357 | 100934505 |
| 336          | SAP30BP    | NM_013260    | chr17 | +      | 73667895  | 73667943  |
| 358          | PDE4B      | NM_001037340 | chr1  | +      | 66384279  | 66384518  |
| 402          | ACTN4      | NM_004924    | chr19 | +      | 39191239  | 39191354  |
| 415          | IGF1R      | NM_000875    | chr15 | +      | 99478052  | 99478282  |
| 429          | MCM8       | NM_032485    | chr20 | +      | 5953701   | 5953842   |
| 453          | CDADC1     | NM_030911    | chr13 | +      | 49833481  | 49833659  |
| 494          | PAN3       | NM_175854    | chr13 | +      | 28771321  | 28771483  |

|      |           |              |       |   |           |           |
|------|-----------|--------------|-------|---|-----------|-----------|
| 508  | CASP8     | NM_033358    | chr2  | + | 202131183 | 202131514 |
| 512  | EFCAB2    | NR_026588    | chr1  | + | 245180543 | 245180628 |
| 515  | CUX1      | NM_181552    | chr7  | + | 101671377 | 101671425 |
| 526  | LRRC61    | NM_001142928 | chr7  | + | 150022929 | 150023099 |
| 538  | PIK3C3    | NM_002647    | chr18 | + | 39537534  | 39537723  |
| 556  | NVL       | NM_206840    | chr1  | - | 224455735 | 224455835 |
| 563  | CACNA2D3  | NM_018398    | chr3  | + | 54850879  | 54850897  |
| 568  | TNRC6A    | NM_014494    | chr16 | + | 24804793  | 24804970  |
| 578  | RBM6      | NM_005777    | chr3  | + | 50085677  | 50085752  |
| 582  | SPIRE1    | NM_001128627 | chr18 | - | 12546672  | 12546903  |
| 597  | PDLIM5    | NM_001011516 | chr4  | + | 95444874  | 95445026  |
| 598  | LIMCH1    | NM_001112717 | chr4  | + | 41496552  | 41496623  |
| 628  | OSBPL6    | NM_145739    | chr2  | + | 179236852 | 179236960 |
| 682  | RPTOR     | NM_020761    | chr17 | + | 78617527  | 78617610  |
| 740  | MED30     | NM_080651    | chr8  | + | 118542961 | 118543066 |
| 772  | DNM1L     | NM_012062    | chr12 | + | 32891197  | 32891230  |
| 798  | SWAP70    | NM_015055    | chr11 | + | 9735012   | 9735186   |
| 799  | TCF7L2    | NM_001146284 | chr10 | + | 114799783 | 114799885 |
| 811  | PSMF1     | NM_006814    | chr20 | + | 1115763   | 1115949   |
| 824  | CDKL5     | NM_001037343 | chrX  | + | 18460494  | 18460543  |
| 825  | ADAMTS13  | NM_139027    | chr9  | + | 136308496 | 136308682 |
| 858  | ARHGEF10L | NM_001011722 | chr1  | + | 17961042  | 17961057  |
| 879  | TBC1D19   | NM_018317    | chr4  | + | 26622234  | 26622310  |
| 955  | PSMG4     | NM_001128592 | chr6  | + | 3264442   | 3264559   |
| 965  | MEIS1     | NM_002398    | chr2  | + | 66739280  | 66739426  |
| 1004 | EYA4      | NM_172103    | chr6  | + | 133777693 | 133777786 |
| 1025 | IKZF2     | NM_016260    | chr2  | - | 213921556 | 213921823 |

|      |          |              |       |   |           |           |
|------|----------|--------------|-------|---|-----------|-----------|
| 1036 | CEP192   | NM_032142    | chr18 | + | 13113584  | 13113704  |
| 1048 | ATE1     | NM_001001976 | chr10 | - | 123629520 | 123629553 |
| 1119 | KIF13B   | NM_015254    | chr8  | - | 29053703  | 29053716  |
| 1137 | GPD2     | NM_000408    | chr2  | + | 157352555 | 157352727 |
| 1141 | HNRNPUL1 | NM_007040    | chr19 | + | 41787067  | 41787180  |
| 1150 | TOMM20L  | NM_207377    | chr14 | + | 58869397  | 58869479  |
| 1154 | TMTC2    | NM_152588    | chr12 | + | 83250788  | 83251359  |
| 1269 | EPB41L1  | NM_177996    | chr20 | + | 34700347  | 34700402  |
| 1295 | SNAP47   | NM_053052    | chr1  | + | 227935392 | 227935934 |
| 1299 | WDR3     | NM_006784    | chr1  | + | 118501532 | 118501626 |
| 1307 | UBAP2    | NM_018449    | chr9  | - | 33956076  | 33956144  |
| 1312 | MAPK14   | NM_139013    | chr6  | + | 36070347  | 36070535  |
| 1317 | SORBS2   | NM_001145675 | chr4  | - | 186560030 | 186560189 |
| 1349 | UBE2E2   | NM_152653    | chr3  | + | 23541098  | 23541231  |
| 1464 | MED15    | NM_015889    | chr22 | + | 20909222  | 20909435  |
| 1477 | PAPPA    | NM_002581    | chr9  | + | 118973917 | 118974211 |
| 1508 | MYPN     | NM_032578    | chr10 | + | 69881194  | 69882097  |
| 1535 | MAPK14   | NM_139013    | chr6  | + | 36063763  | 36063843  |
| 1563 | TIMM50   | NM_001001563 | chr19 | + | 39976183  | 39976242  |
| 1579 | LDLRAD3  | NM_174902    | chr11 | + | 36057652  | 36057799  |
| 1581 | PARD3    | NM_019619    | chr10 | - | 34739244  | 34739376  |
| 1625 | LIMCH1   | NM_001112719 | chr4  | + | 41640948  | 41640984  |
| 1645 | CRTC3    | NM_001042574 | chr15 | + | 91136867  | 91136987  |
| 1661 | PAPPA    | NM_002581    | chr9  | + | 118969734 | 118969880 |
| 1671 | NUPL2    | NM_007342    | chr7  | + | 23235457  | 23235534  |
| 1674 | SLC22A3  | NM_021977    | chr6  | + | 160857811 | 160857909 |
| 1677 | RUNX2    | NM_004348    | chr6  | + | 45512953  | 45513019  |

|      |        |              |       |   |           |           |
|------|--------|--------------|-------|---|-----------|-----------|
| 1679 | CDYL   | NM_001143971 | chr6  | + | 4891946   | 4892613   |
| 1717 | TMUB2  | NM_177441    | chr17 | + | 42266389  | 42266956  |
| 1786 | SOLH   | NM_005632    | chr16 | + | 586028    | 586142    |
| 1801 | TBL1X  | NM_005647    | chrX  | + | 9502939   | 9503074   |
| 1837 | KIRREL | NM_018240    | chr1  | + | 158045902 | 158046052 |
| 1870 | ATG7   | NM_001144912 | chr3  | + | 11468277  | 11468400  |
| 1883 | POLR1B | NM_019014    | chr2  | + | 113316869 | 113317151 |
| 1897 | FUT8   | NM_178154    | chr14 | + | 65922338  | 65922436  |
