# Supplementary material for: ALS-Associated FUS Mutations Result in Compromised FUS Alternative Splicing and Autoregulation
Source: PubMed Central journal article supplement (PMC3814325; doi:10.1371/journal.pgen.1003895), 2013-10-31
Supplement: pgen.1003895.s013.pdf [file pgen.1003895.s013.pdf]

**Table S4. Gene Ontology (GO) biological process analysis of genes encoding FUS-associated cassette exons**

| <b>Annotation Cluster 1*</b> |                                                                                                         | <b>Enrichment Score: 2.677720623890005</b>  |               |
|------------------------------|---------------------------------------------------------------------------------------------------------|---------------------------------------------|---------------|
| <b>Category</b>              | <b>Term</b>                                                                                             | <b>%</b>                                    | <b>PValue</b> |
| GOTERM_BP_FAT                | GO:0045944~positive regulation of transcription from RNA polymerase II promoter                         | 7.73                                        | 1.92E-04      |
| GOTERM_BP_FAT                | GO:0010604~positive regulation of macromolecule metabolic process                                       | 11.60                                       | 1.60E-03      |
| GOTERM_BP_FAT                | GO:0045935~positive regulation of nucleobase, nucleoside, nucleotide and nucleic acid metabolic process | 9.39                                        | 1.67E-03      |
| GOTERM_BP_FAT                | GO:0045941~positive regulation of transcription                                                         | 8.84                                        | 1.81E-03      |
| GOTERM_BP_FAT                | GO:0010557~positive regulation of macromolecule biosynthetic process                                    | 9.39                                        | 2.04E-03      |
| GOTERM_BP_FAT                | GO:0010628~positive regulation of gene expression                                                       | 8.84                                        | 2.07E-03      |
| GOTERM_BP_FAT                | GO:0051173~positive regulation of nitrogen compound metabolic process                                   | 9.39                                        | 2.30E-03      |
| GOTERM_BP_FAT                | GO:0031328~positive regulation of cellular biosynthetic process                                         | 9.39                                        | 2.66E-03      |
| GOTERM_BP_FAT                | GO:0045893~positive regulation of transcription, DNA-dependent                                          | 7.73                                        | 2.90E-03      |
| GOTERM_BP_FAT                | GO:0009891~positive regulation of biosynthetic process                                                  | 9.39                                        | 2.98E-03      |
| GOTERM_BP_FAT                | GO:0051254~positive regulation of RNA metabolic process                                                 | 7.73                                        | 3.15E-03      |
| GOTERM_BP_FAT                | GO:0006357~regulation of transcription from RNA polymerase II promoter                                  | 9.39                                        | 1.13E-02      |
| <b>Annotation Cluster 2</b>  |                                                                                                         | <b>Enrichment Score: 1.8741283471568786</b> |               |
| <b>Category</b>              | <b>Term</b>                                                                                             | <b>%</b>                                    | <b>PValue</b> |
| GOTERM_BP_FAT                | GO:0010629~negative regulation of gene expression                                                       | 8.29                                        | 3.86E-03      |
| GOTERM_BP_FAT                | GO:0010558~negative regulation of macromolecule biosynthetic process                                    | 8.29                                        | 6.78E-03      |

|                             |                                                                                                         |          |               |
|-----------------------------|---------------------------------------------------------------------------------------------------------|----------|---------------|
| GOTERM_BP_FAT               | GO:0031327~negative regulation of cellular biosynthetic process                                         | 8.29     | 7.24E-03      |
| GOTERM_BP_FAT               | GO:0009890~negative regulation of biosynthetic process                                                  | 8.29     | 8.43E-03      |
| GOTERM_BP_FAT               | GO:0016481~negative regulation of transcription                                                         | 7.18     | 1.09E-02      |
| GOTERM_BP_FAT               | GO:0010605~negative regulation of macromolecule metabolic process                                       | 9.39     | 2.22E-02      |
| GOTERM_BP_FAT               | GO:0045934~negative regulation of nucleobase, nucleoside, nucleotide and nucleic acid metabolic process | 7.18     | 2.40E-02      |
| GOTERM_BP_FAT               | GO:0051172~negative regulation of nitrogen compound metabolic process                                   | 7.18     | 2.59E-02      |
| GOTERM_BP_FAT               | GO:0045892~negative regulation of transcription, DNA-dependent                                          | 5.52     | 2.59E-02      |
| GOTERM_BP_FAT               | GO:0051253~negative regulation of RNA metabolic process                                                 | 5.52     | 2.90E-02      |
|                             |                                                                                                         |          |               |
| <b>Annotation Cluster 3</b> | <b>Enrichment Score: 1.5872937944810788</b>                                                             |          |               |
| <b>Category</b>             | <b>Term</b>                                                                                             | <b>%</b> | <b>PValue</b> |
| GOTERM_BP_FAT               | GO:0060284~regulation of cell development                                                               | 3.87     | 1.72E-02      |
| GOTERM_BP_FAT               | GO:0050767~regulation of neurogenesis                                                                   | 3.31     | 2.08E-02      |
| GOTERM_BP_FAT               | GO:0051960~regulation of nervous system development                                                     | 3.31     | 3.32E-02      |
| GOTERM_BP_FAT               | GO:0045664~regulation of neuron differentiation                                                         | 2.76     | 3.77E-02      |

\* GO functional annotation clustering was performed using DAVID Bioinformatics Resources 6.7 ( <http://david.abcc.ncifcrf.gov/>).
