# Supplementary material for: ALS-Associated FUS Mutations Result in Compromised FUS Alternative Splicing and Autoregulation
Source: PubMed Central journal article supplement (PMC3814325; doi:10.1371/journal.pgen.1003895), 2013-10-31
Supplement: pgen.1003895.s014.pdf [file pgen.1003895.s014.pdf]

**Table S5. KEGG pathways of genes encoding FUS-associated cassette exons**

| <b>Category*</b> | <b>Term</b>                      | <b>%</b> | <b>PValue</b> |
|------------------|----------------------------------|----------|---------------|
| KEGG_PATHWAY     | hsa04310:Wnt signaling pathway   | 3.87     | 1.33E-02      |
| KEGG_PATHWAY     | hsa04520:Adherens junction       | 2.76     | 3.33E-02      |
| KEGG_PATHWAY     | hsa04330:Notch signaling pathway | 2.21     | 3.58E-02      |

\* Analysis of KEGG pathways was performed using DAVID Bioinformatics Resources 6.7 (<http://david.abcc.ncifcrf.gov/>).
